# Supplementary material for: Single-Cell RNA Sequencing Reveals a Dynamic Stromal Niche That Supports Tumor Growth
Source: PubMed Central journal article supplement (PMC7242909; doi:10.1016/j.celrep.2020.107628), 2020-05-19
Supplement: mmc1.pdf [file mmc1.pdf]

**Cell Reports, Volume 31**

**Supplemental Information**

**Single-Cell RNA Sequencing Reveals a Dynamic  
Stromal Niche That Supports Tumor Growth**

**Sarah Davidson, Mirjana Efremova, Angela Riedel, Bidesh Mahata, Jhuma Pramanik, Jani Huuhtanen, Gozde Kar, Roser Vento-Tormo, Tzachi Hagai, Xi Chen, Muzlifah A. Haniffa, Jacqueline D. Shields, and Sarah A. Teichmann**



**1. (A)** Volumes of B16-F10 melanomas at day 5, day 8 and day 11. Data presented as mean  $\pm$  SEM \*  $P < 0.05$ , \*\*  $P < 0.01$ , \*\*\*  $P < 0.001$ , \*\*\*\*  $P < 0.0001$ , one way Anova with Tukey post-hoc test,  $n = 22$  individual mice. **(C)** Gating strategy for index sorted cell populations. **(B)** Quality control of the scRNA-seq dataset. Histograms show the distribution of the cells that passed the computational quality control ordered by number of detected genes and mitochondrial gene expression content. **(D)** Heatmap of marker genes showing relative expression (z-score) of the top 5 markers for each cluster presented in Fig. 1B.

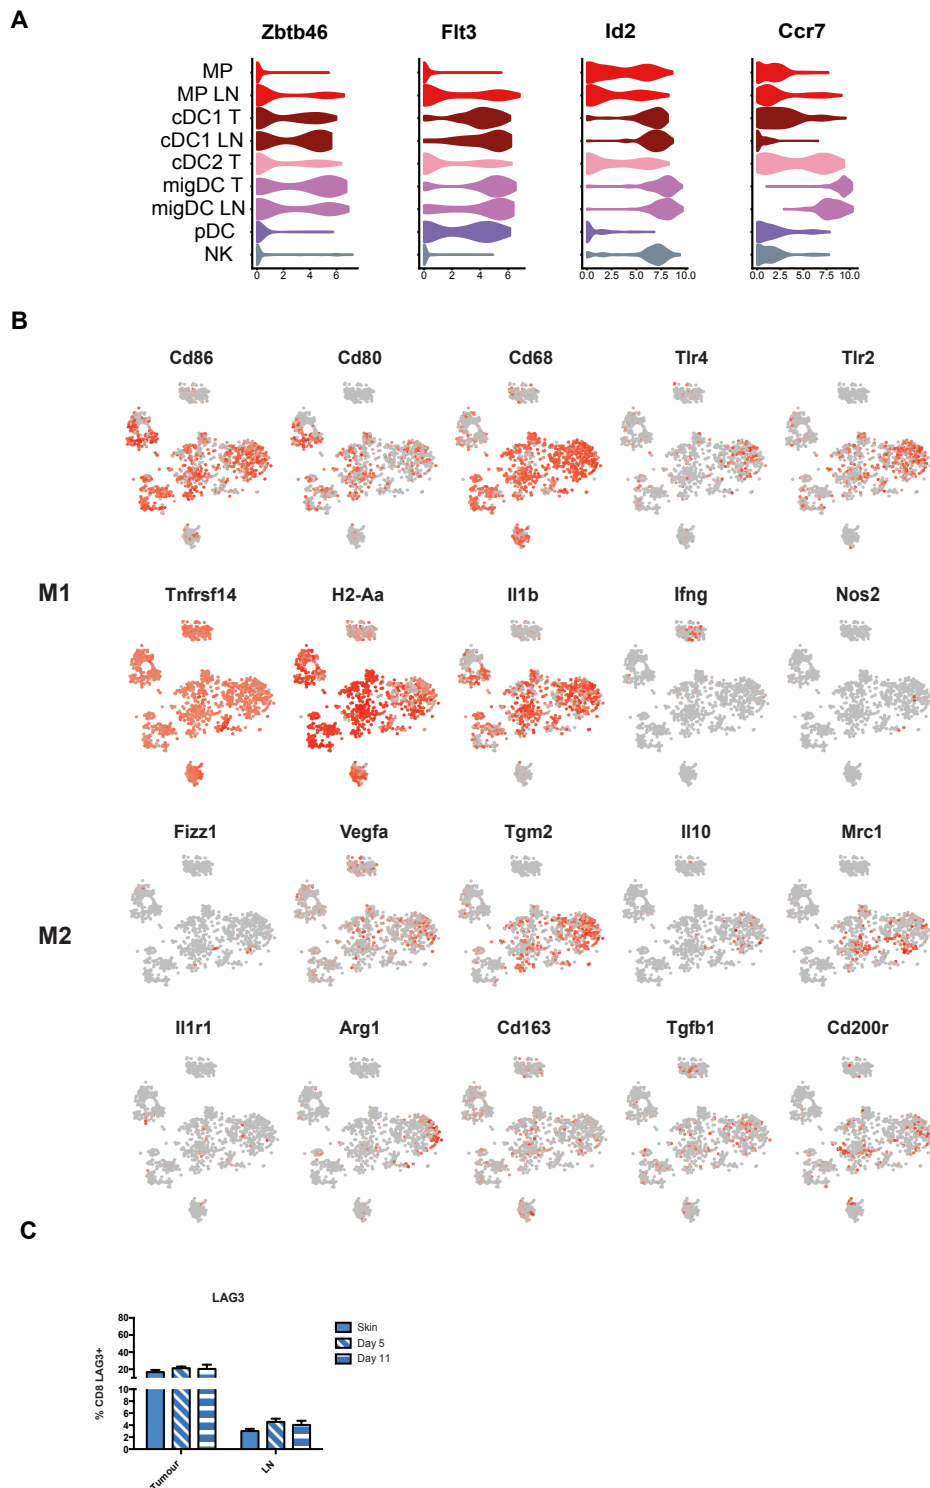

**Supplementary Figure 2. Immune phenotypes, Related to Figures 2 and 3. (A)** Violin plots showing expression of cDC1 transcription factors for each innate immune subpopulation. **(B)** tSNE plots showing expression of M1 and M2 macrophage markers in the innate immune subpopulations. Red indicates high expression, grey indicates low expression. **(C)** Percentage



of Lag3<sup>+</sup> (displayed as a percentage of total CD8<sup>+</sup> T cells), in tumours and lymph nodes isolated from skin, day 5 and day 11 tumour bearing or control mice. Data presented as mean  $\pm$  SEM. n=4 independent mice per time point.

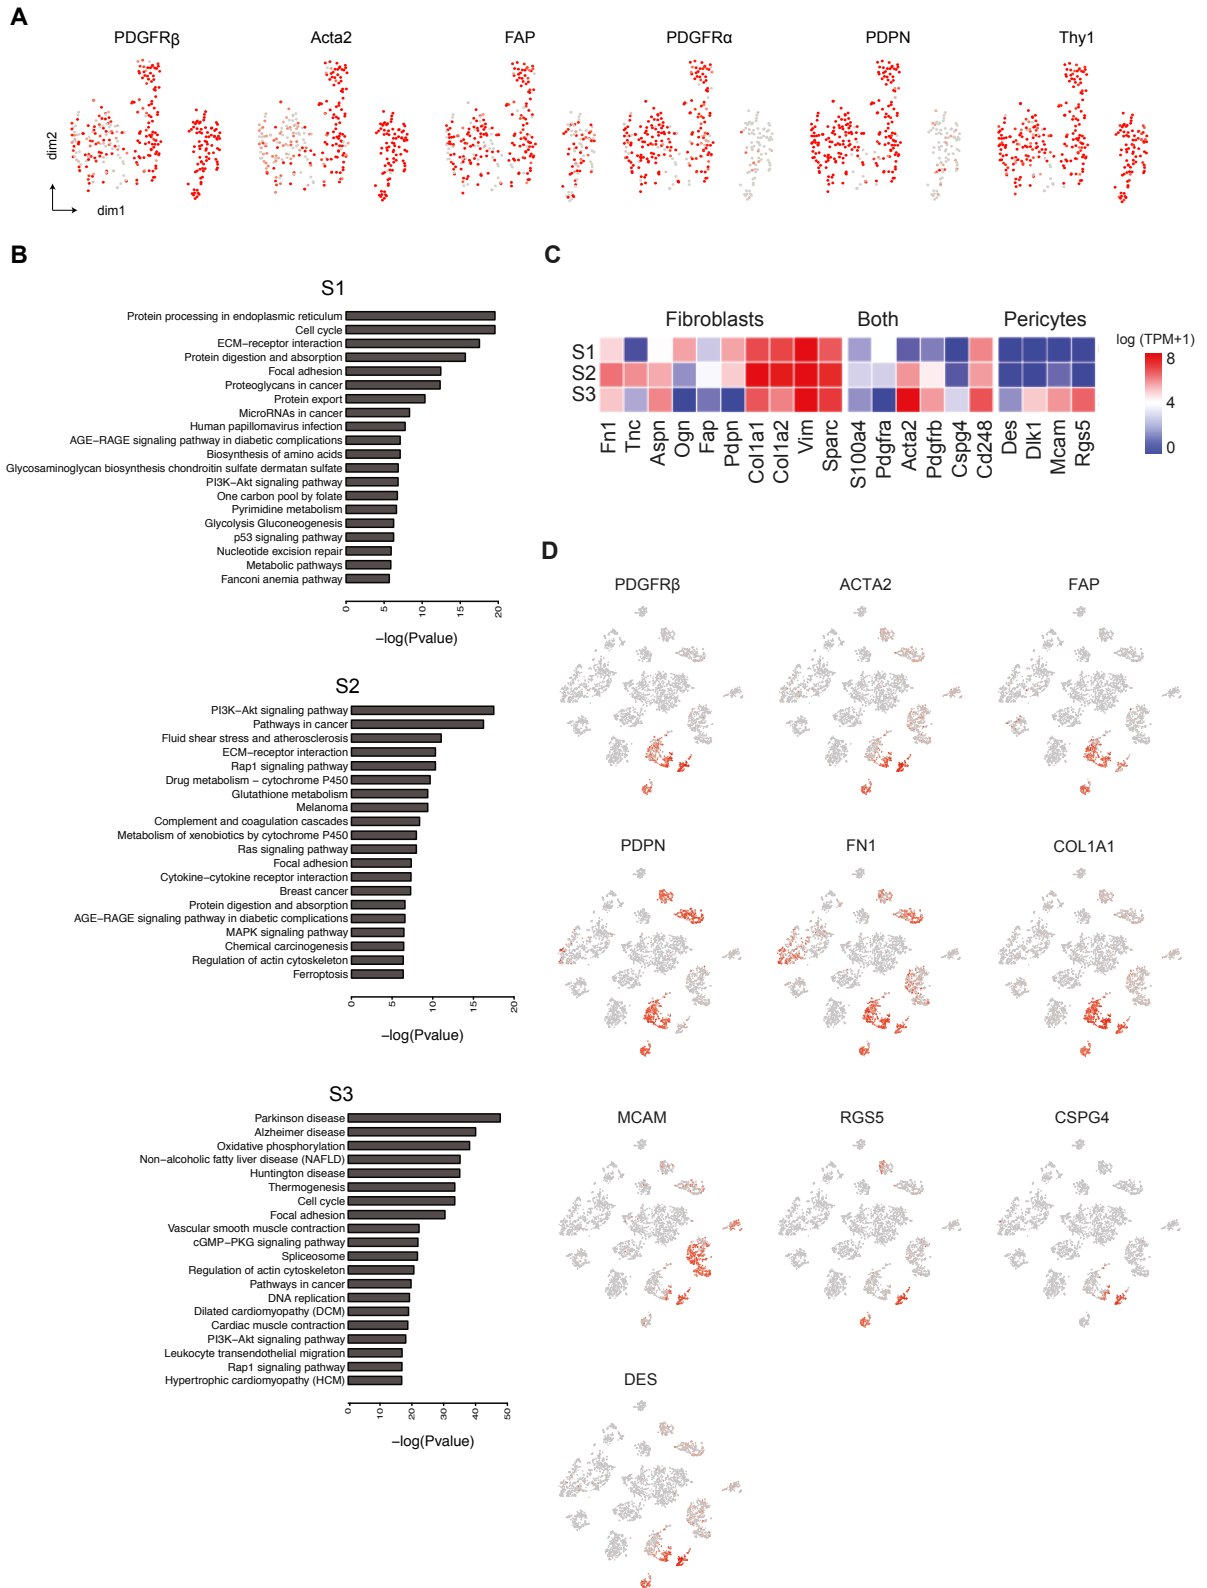

**Supplementary Figure 3. Distinct stromal subpopulations identified in the melanoma mouse model, Related to Figure 4. (A)** tSNE plots showing expression of typical CAF markers. **(B)** Bar plot ( $-\log$  pvalue) depicting the top 20 gene ontology pathways upregulated in each stromal population. **(C)** Heatmap showing expression of canonical fibroblasts and pericytes

markers in the three stromal populations. **(D)** tSNE plots of all sequenced cells, showing expression of typical pericyte markers is also detected in PDPN<sup>+</sup> lymph node fibroblasts.

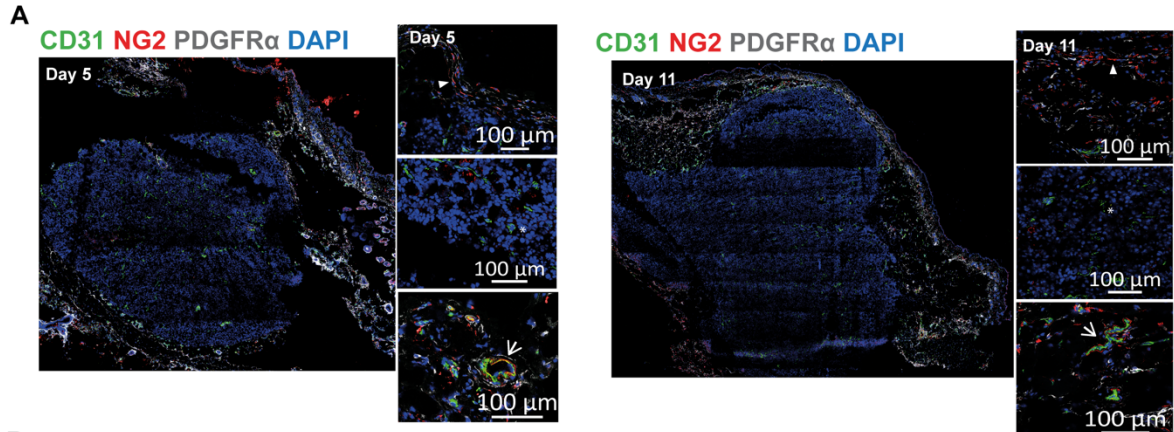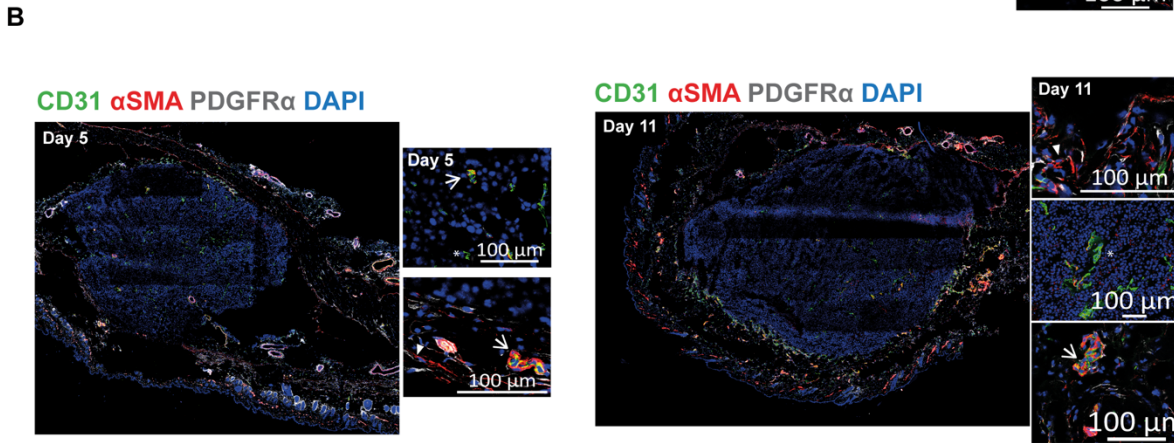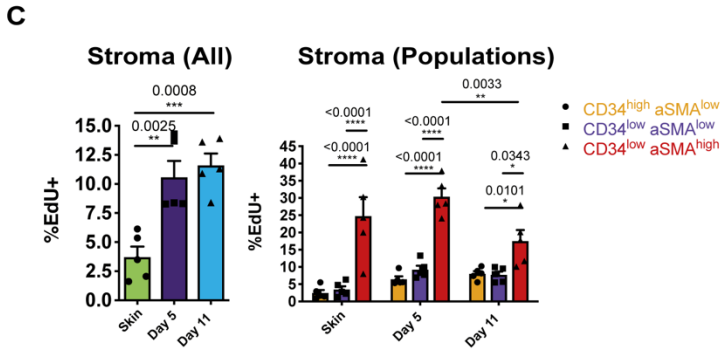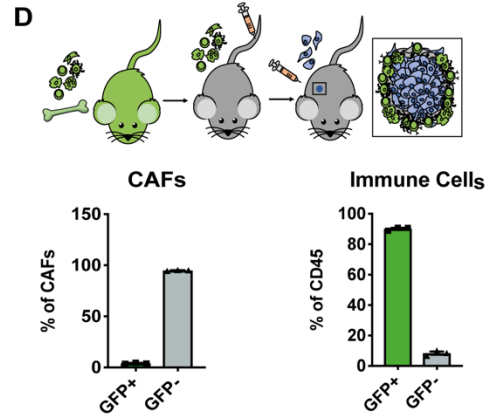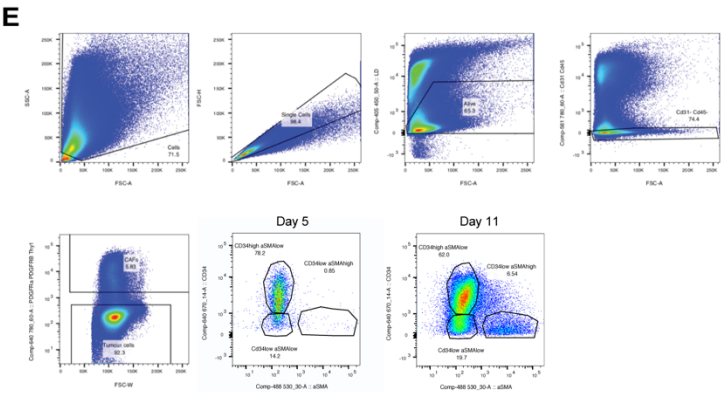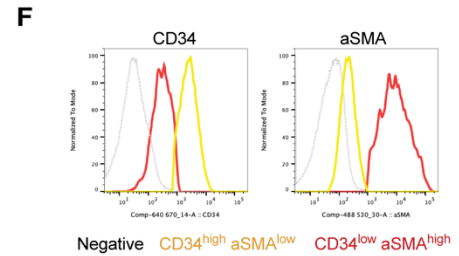

**Supplementary Figure 4. Validation of CAF markers and CAF origin, Related to Figures 4 and 5. (A) and (B)** Confocal imaging showing  $\alpha$ SMA<sup>+</sup> and NG2<sup>+</sup> cells both distinct from and associated with CD31<sup>+</sup> blood vessels. 20x tile scans of whole tumours are displayed, as well as 63x regions of interest. **(C)** EdU incorporation in stromal populations in skin, day 5 and day 11 tumours (left: % of CD45<sup>-</sup> CD31<sup>-</sup> Thy1<sup>+</sup>, right; individual subsets (S1-S3) incorporation into all proliferating fibroblasts (top) and each subset (bottom) in skin, day 5 and day 11 tumours. \* P<0.05, \*\* P<0.01, \*\*\* P<0.001, \*\*\*\* P<0.0001 One way (left) or two way (right) ANOVA with a Tukey post-hoc test. **(D)** Diagram (top) depicting the generation of bone marrow chimeric mice by injecting (IV) bone marrow from CAG-EGFP mice into irradiated WT strains. B16-F10 tumours were injected into chimeric mice and allowed to form for 11 days. The proportion of bone derived marrow cells (GFP<sup>+</sup>) to stromal (CD45<sup>-</sup> CD31<sup>-</sup> Thy1<sup>+</sup>, bottom left) and immune (CD45<sup>+</sup>, bottom right) populations was assessed by flow cytometry. **(E)** Gating strategy used to identify stromal subsets along tumour development, **(F)** showing representative plots from day 5 and 11 tumours and histograms of CD34 and  $\alpha$ SMA levels between populations. Scale bars 100  $\mu$ m

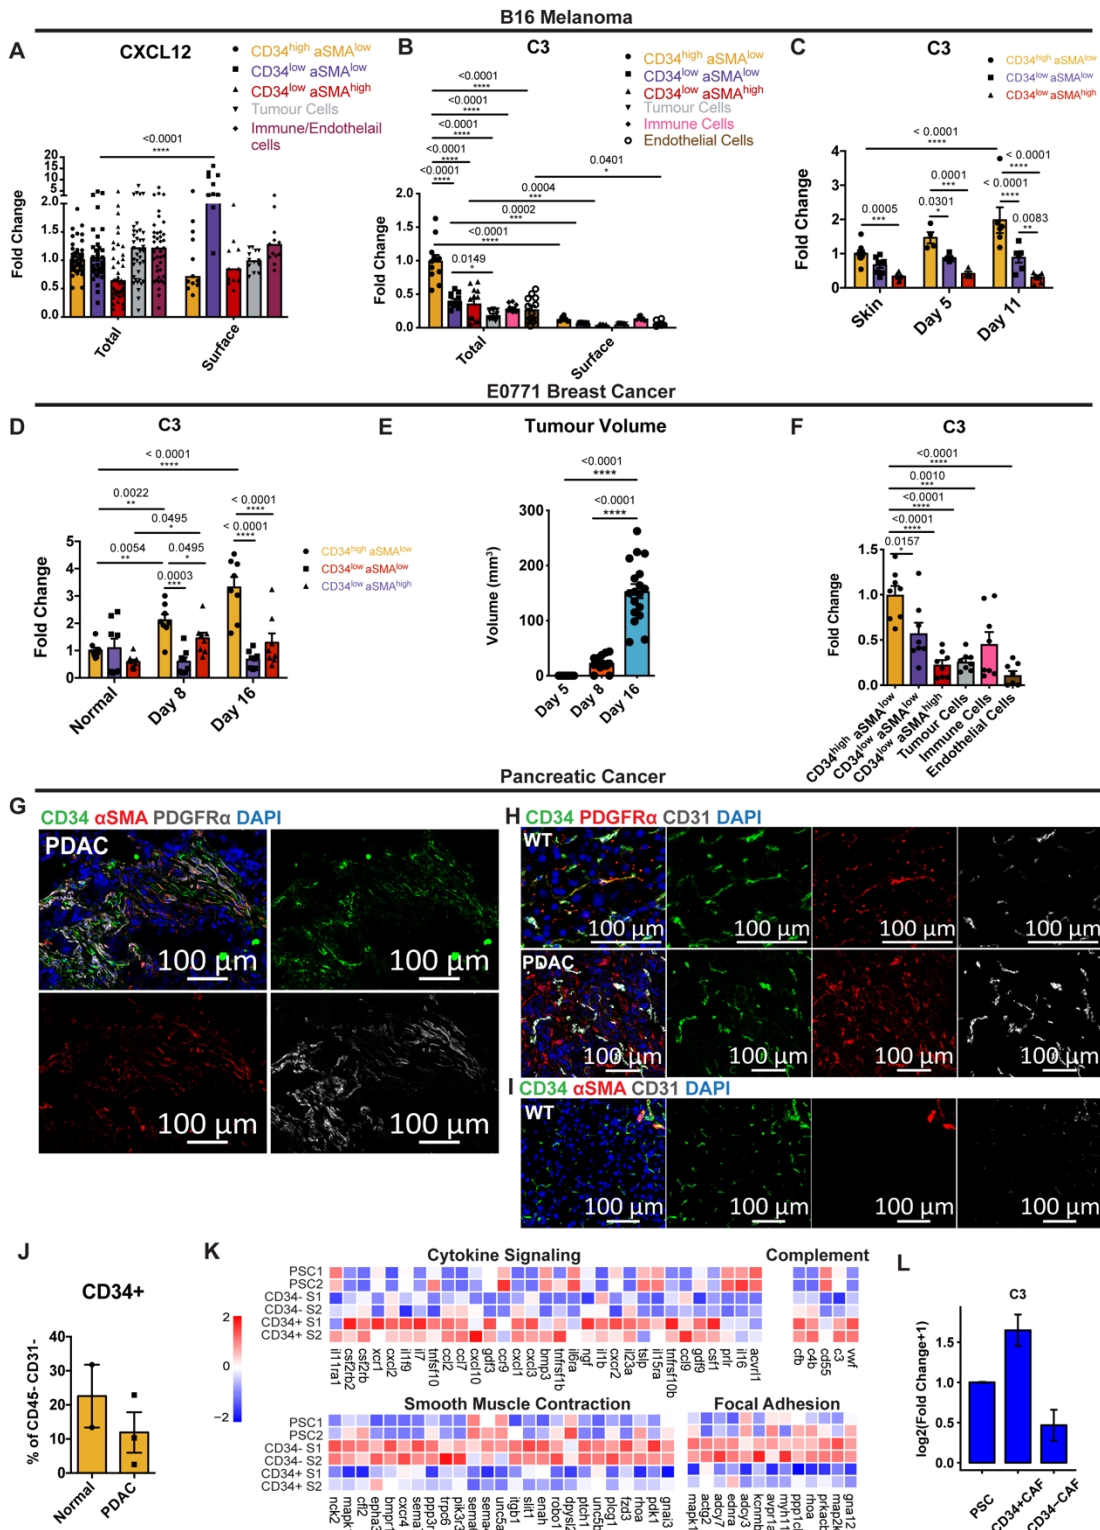

**Supplementary Figure 5. Validation of stromal populations in mouse models of melanoma, breast and pancreatic cancer, Related to Figures 5 and 6.** B16-F10 melanoma: Total and surface CXCL12 (A) and C3 (B) expression in day 11 tumours in stromal populations, immune, endothelial and tumour cells. CXCL12: n = minimum of 12 mice, C3: n = 6 mice. (C) C3 expression within each stromal population in normal skin, day 5 and day 11 tumours n =

minimum 4 mice. E0771 breast tumours: **(D)** C3 expression within fibroblast subsets in normal breast tissue, day 8 and day 16 tumours, n = 8 mice. **(E)** Tumour volumes at day 5, day 8 and day 16, n = 18 mice. **(F)** C3 expression in fibroblast populations, immune, endothelial and tumour cells in day 16 tumours, n = 8 mice. Pancreatic adenocarcinoma: **(G)** IF images of KPC tumours showing expression of CD34 (green),  $\alpha$ SMA (red) and PDGFR $\alpha$  (grey). **(H)** IF images of WT pancreas compared to KPC tumours (PDAC), showing expression of CD34 (green), PDGFR $\alpha$  (red) and CD31 (grey). Pancreatic stellate cells in normal tissue express CD34 and PDGFR $\alpha$ , whereas CD34 expression is mostly restricted to CD31+ blood vessels in PDAC tissue. **(I)** IF images showing CD34 (green),  $\alpha$ SMA (red) and CD31 (grey) in normal pancreatic tissue. Here, pancreatic stellate cells do not express  $\alpha$ SMA. **(J)** Graph displays FACS quantification of CD34+ fibroblasts as a percentage of CD45-CD31- cells in normal pancreatic tissue and KPC tumours. normal pancreas: n = 2 mice, KPC tumours: n = 3 mice. **(K)** Publicly available RNA seq data of KPC CD34+ and CD34- stromal cells, as well as normal pancreatic stellate cells (PSCs) was downloaded and analysed. Heat maps show selected pathways from GO analysis performed on differentially expressed genes between CD34+ and CD34- populations, z scores are displayed. **(L)** Graph displaying log<sub>2</sub>(Fold change+1) of C3 RNA expression from PSCs, CD34+ and CD34- stromal cells. Graphs were made from previously mentioned publicly available data. \*\* P<0.01, \*\*\* P<0.001, \*\*\*\* P<0.0001, two way anova with a Sidak (A and B) and Tukey (C and D) post-hoc test, one way anova with Tukey post-hoc test. (E and F). All images are representative of at least n=3 mice and acquired at 63x, scale bars displayed.

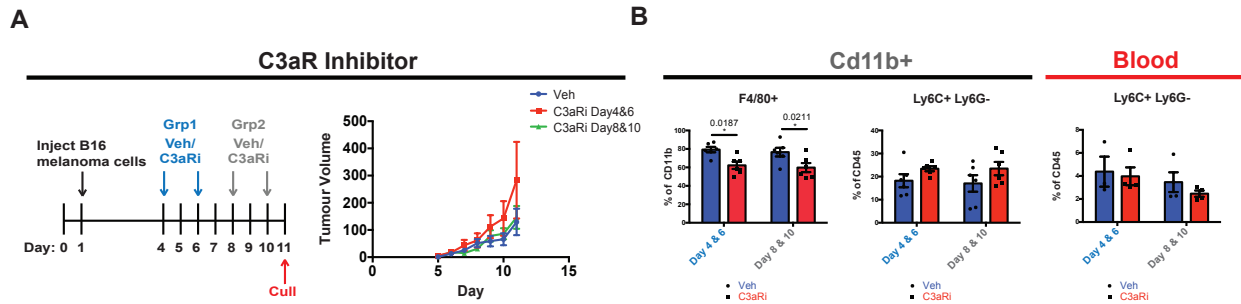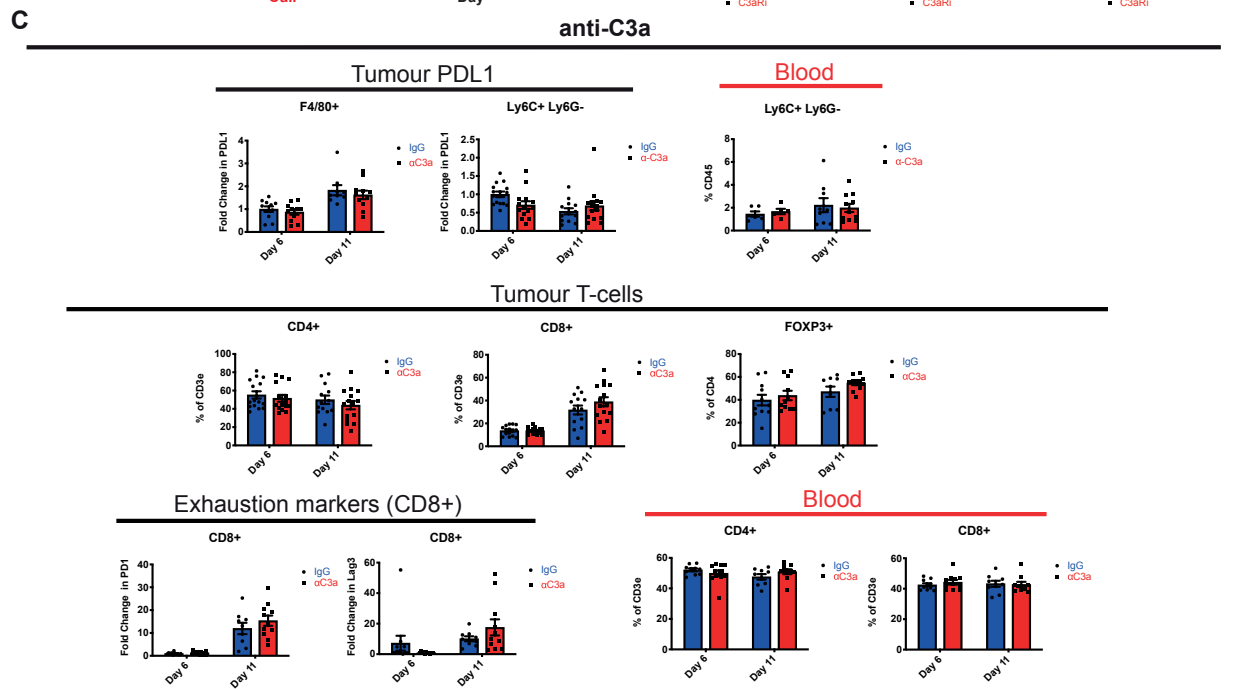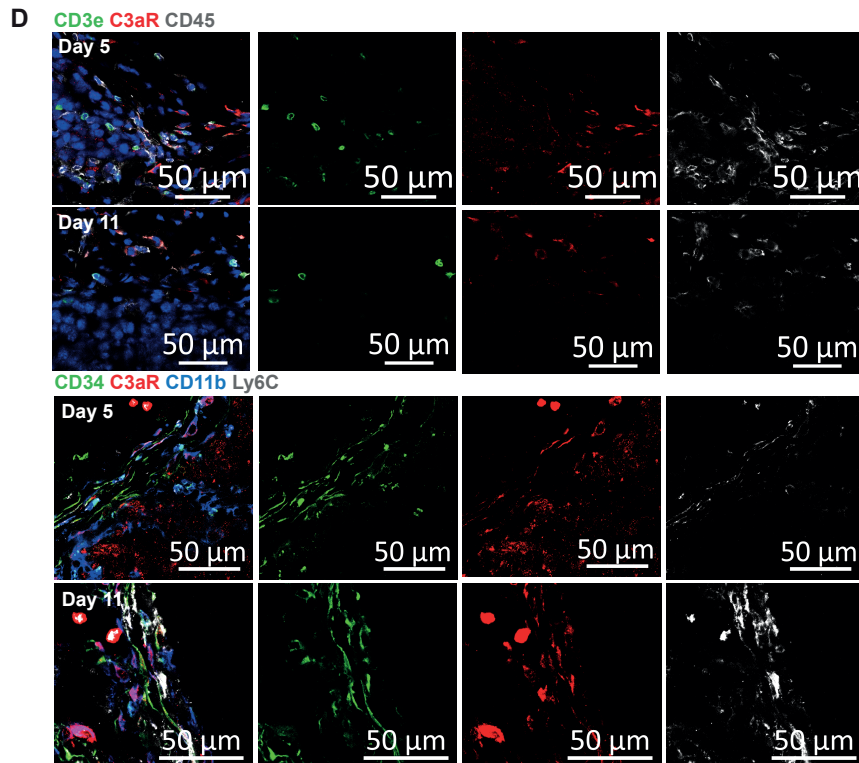



**Supplementary Figure 6. The effects of disrupting C3a/C3aR Interactions on tumour development and immune infiltration, Related to Figure 6. (A)** Experimental design of C3aR antagonism, using the small molecule SB290157: Mice received injections of SB290157 at either day 4 and day 6 or day 8 and day 11, all mice were culled at day 11 (left). Tumour volumes ( $\text{mm}^3$ ) for vehicle controls and each treatment regime are shown (right),  $n = 6$  mice. **(B)** Immune infiltration of F4/80+ macrophages and Ly6C+ Ly6G- monocytes in the tumour (left) and blood (right). This is shown as the percentage of CD11b+ cells (F4/80) or CD45+ cells (Ly6C+ Ly6G-),  $n = 6$  tumours. \* =  $P < 0.05$  (Two way anova with Sidak post-hoc test). **(C)** The effects of neutralising C3a on immune infiltrates in the tumour and blood. Top panel: Fold change in fluorescence intensity of PDL1 on tumour myeloid populations, normalized to IgG day6 (left) and the number of Ly6C+ Ly6G- monocytes in the blood, shown as a percentage of CD45 cells. Middle panel: Number of tumour infiltrating CD8+, CD4+ and FOXP3+ T-cells, displayed as a percentage of CD3e or CD4 T-cells. Bottom panel: Fold change in fluorescence intensity of T-cell exhaustion markers PD1 and Lag3 in CD8 T cells, normalized to IgG day 6 (left). Numbers of CD8 and CD4 T cells in the blood of treated mice, displayed as a percentage of CD3e T-cells.  $n =$  minimum of 11 mice. **(D)** Confocal images showing expression of C3aR on immune populations in day 5 and 11 tumours. Top panel: C3aR is not expressed on Cd3e+ T cells, CD3e (green), C3aR (red) and CD45 (grey). Bottom panel: C3aR is expressed by Ly6C+ CD11b+ monocytes. Images were acquired at 63x and scale bars are displayed. day 5  $n=3$  tumours, day 11  $n=2$  tumours.

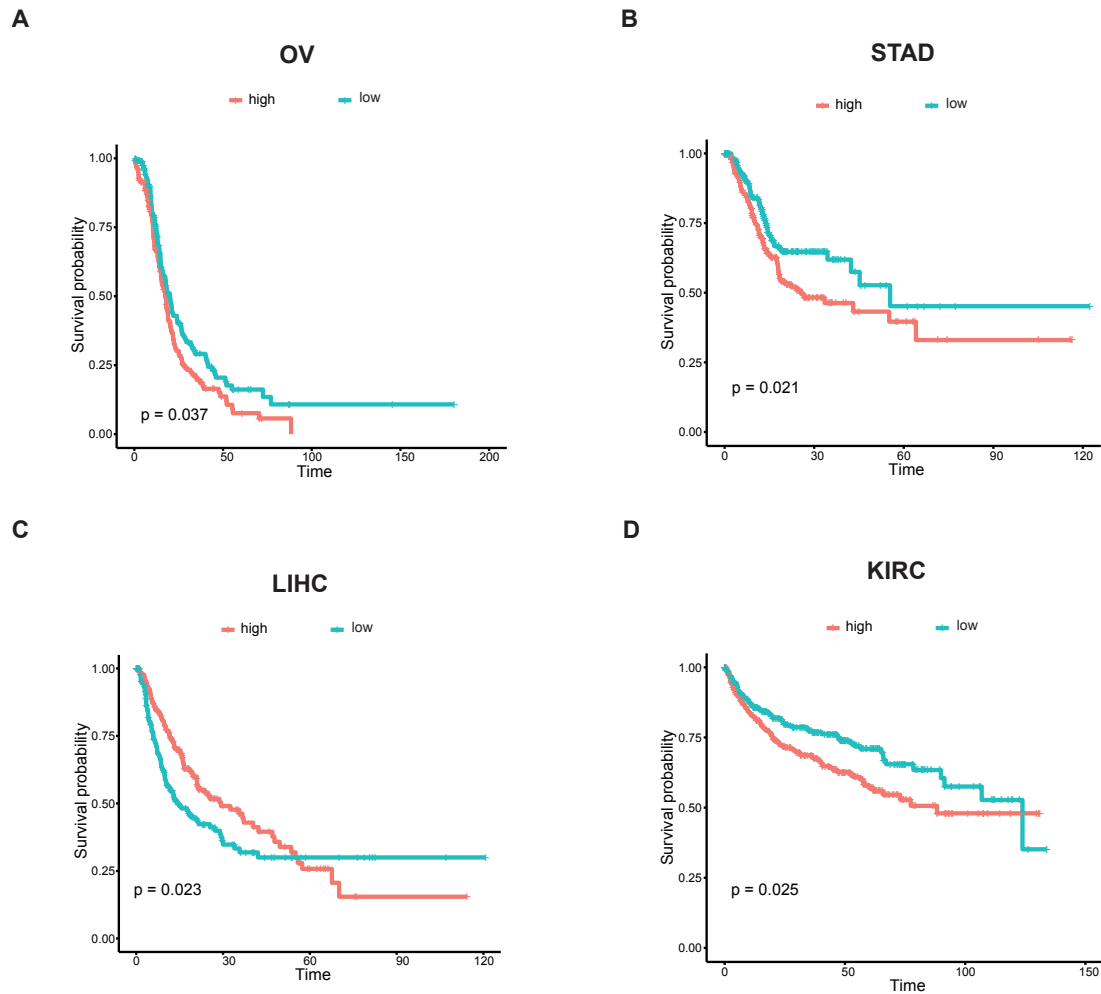

**Supplementary Figure 7. Survival analysis of C3 in different TCGA datasets, Related to Figure 7. (A)** Kaplan-Meier survival curve of Ovarian serous cystadenocarcinoma (OV) patients showing progression-free survival based on median C3 expression levels. **(B)** Kaplan-Meier survival curve of Stomach adenocarcinoma (STAD) patients showing progression-free survival based on median C3 expression levels. **(C)** Kaplan-Meier survival curve of Liver hepatocellular carcinoma (LIHC) patients showing progression-free survival based on median C3 expression levels. **(D)** Kaplan-Meier survival curve of Kidney renal clear cell carcinoma (KIRC) patients showing progression-free survival based on median C3 expression levels.
